# Supplementary material for: Room-temperature and one-minute synthesis of alcohol-soluble and ultra-small Eu-doped CaMoO 4 nanoparticles
Source: Royal Society of Chemistry journal article supplement (doi:10.1039/d5dt03028e), 2026-01-01
Supplement: d5dt03028e1.pdf [file d5dt03028e1.pdf]

## Supporting Information

### **Room-Temperature and One-Minute Synthesis of Alcohol-Soluble and Ultra-Small Eu-Doped $\text{CaMoO}_4$ Nanoparticles**

Ling Zhong<sup>a</sup>, Mengxin Liu<sup>\*b</sup>, Xin Su<sup>a</sup>, Chunyi Li<sup>a</sup>, Xinan Shi<sup>\*a</sup> and Daocheng Pan<sup>\*a, b</sup>

Guangxi Key Laboratory of Advanced Rare Earth Materials; Guangxi Key Laboratory of Processing for Non-ferrous Metals and Featured Materials; MOE Key Laboratory of New Processing Technology for Nonferrous Metals and Materials; School of Resources, Environment and Materials, Guangxi University, Nanning 530004, China

<sup>b</sup>School of Chemistry and Chemical Engineering, Guangxi University, Nanning 530004, China

\*E-mail: mxliu@st.gxu.edu.cn, xashi@gxu.edu.cn and dcpan@gxu.edu.cn

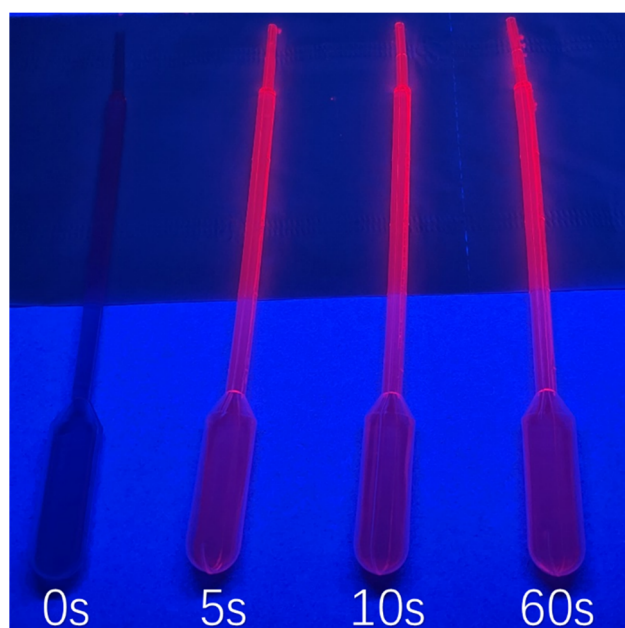

**Figure S1.** Digital photographs of  $\text{Eu}^{3+}$ -doped  $\text{CaMoO}_4$  nanocrystal crude solutions synthesized at room temperature with reaction times of 0 s, 5 s, 10 s, and 60 s, respectively.

**Table S1.** Detailed PLQY values of Eu<sup>3+</sup>-doped CaMoO<sub>4</sub> nanocrystals in different batches.

|        | Eu <sup>3+</sup> mol% | $\lambda_{\text{ex}}$ (nm) | PLQY (%) |
|--------|-----------------------|----------------------------|----------|
| Group1 | 1                     | 280                        | 9.74     |
|        | 5                     |                            | 25.72    |
|        | 10                    |                            | 36.95    |
|        | 15                    |                            | 45.28    |
|        | 20                    |                            | 42.61    |
|        | 25                    |                            | 41.9     |
| Group2 | 1                     | 280                        | 9.02     |
|        | 5                     |                            | 28.3     |
|        | 10                    |                            | 39.96    |
|        | 15                    |                            | 46.12    |
|        | 20                    |                            | 44.59    |
|        | 25                    |                            | 40.73    |
| Group3 | 1                     | 280                        | 10.07    |
|        | 5                     |                            | 31.68    |
|        | 10                    |                            | 40.84    |
|        | 15                    |                            | 46.59    |
|        | 20                    |                            | 43.61    |
|        | 25                    |                            | 41.97    |

**Table S2.** Summaries of Eu<sup>3+</sup>-doped CaMoO<sub>4</sub> nanocrystals of two room-temperature synthesis methods.

| Synthesis conditions                                  | Particle size (nm) | PLQY (%) | Solvent compatibility | Ref.      |
|-------------------------------------------------------|--------------------|----------|-----------------------|-----------|
| Butyric acid and butylamine<br>ethanol/water          | 3.4                | 85.3     | chloroform            | 1         |
| Propionic acid and<br>propylamine<br>ethanol/methanol | 3.4                | 46.12    | ethanol               | This work |

**Table S3.** Comparisons of Eu<sup>3+</sup>-doped CaMoO<sub>4</sub> phosphors prepared with different synthetic methods.

| Synthesis method                           | T (°C) | Synthesis time | PLQY (%) | Ref.      |
|--------------------------------------------|--------|----------------|----------|-----------|
| Solid-state method                         | 800    | 4 h            | 86.80    | 1         |
| Nitrate-citrate gel combustion method      | 700    | 3 h            | 45.17    | 2         |
| Propionic acid/propylamine-assisted method | 25     | 1 min          | 46.12    | This work |

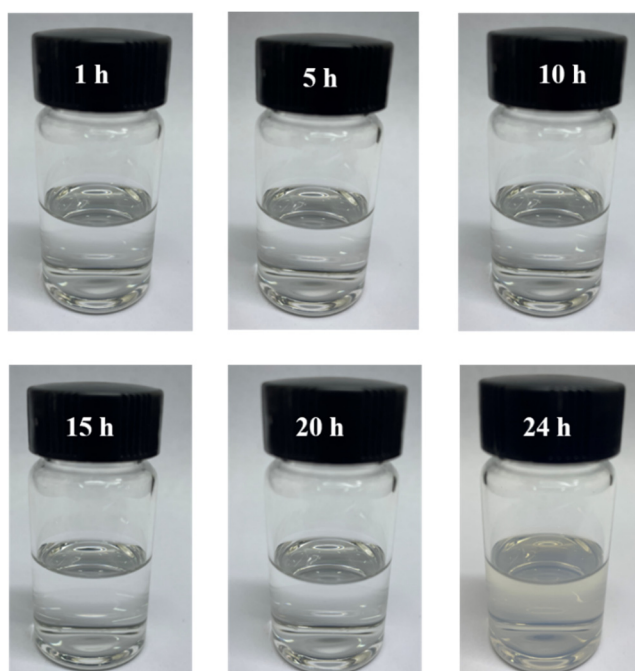

**Figure S2.** Photographs taken at different period of time for  $\text{Ca}_{0.85}\text{MoO}_4:\text{Eu}^{3+}_{0.15}$  nanocrystal solutions (10 mg/mL).

## References

1. M. Liu, X. Shi, Q. Cao, B. Li, Z. Ni, C. Lu, D. Pan and B. Zou, *Small*, 2023, **19**, 202301680.
2. A. Tyagi, D. Mandal, M. Rakshita, D. Haranath and C. Shivakumara, *J. Lumines.*, 2026, **289**, 121609.
